# Supplementary material for: Preparation of nano dumbbell-shaped silver bismuth iodide perovskite hybrids and their enhanced photocurrent properties
Source: Royal Society of Chemistry journal article supplement (doi:10.1039/d3nj01064c), 2023-01-01
Supplement: d3nj01064c1.pdf [file d3nj01064c1.pdf]

Electronic Supplementary Information (ESI)

## Nano Dumbbells Shaped Silver Bismuth Iodide Perovskite Hybrids Prepared and Enhanced the Photocurrent Properties

**Sellan Premkumar,<sup>\*a,c,d</sup> Thankappan Thrupthika,<sup>c</sup> Maheswari Palanivel,<sup>c</sup> Dan Liu,<sup>\*b</sup> Devaraj Nataraj,<sup>c</sup> Wei Lei,<sup>d</sup> and Jianzhou Gui<sup>\*a,b</sup>**

---

<sup>a</sup>State Key Laboratory of Separation Membranes and Membrane Processes, and School of Material Science and Engineering, Tiangong University, Tianjin 300387, China; E-mail: [guijianzhou@tiangong.edu.cn](mailto:guijianzhou@tiangong.edu.cn)

<sup>b</sup>Tianjin Key Laboratory of Green Chemical Technology and Process Engineering, School of Chemistry, Tiangong University, Binshui West Road 399, Tianjin 300387, China; E-mail: [liudan@tiangong.edu.cn](mailto:liudan@tiangong.edu.cn).

<sup>c</sup>Quantum Materials and Devices Laboratory, Department of Physics, Bharathiar University, Coimbatore, Tamil Nadu - 641046, India. E-mail: [sivajiisro@gmail.com](mailto:sivajiisro@gmail.com).

<sup>d</sup>Display Research Centre, School of Electronic Science and Engineering, Southeast University, Nanjing 210096, People's Republic of China

| S.No | Content                                                                                                                                                                                                                           | Page no. |
|------|-----------------------------------------------------------------------------------------------------------------------------------------------------------------------------------------------------------------------------------|----------|
| 1.   | <b>Figure S1.</b> (a) Excitation dependent Photoluminescence emission spectra and (b) PL emission spectra of as prepared and after six months aged Dumbbell shaped silver bismuth iodide perovskite hybrids samples respectively. | 3        |
| 2.   | <b>Figure S2.</b> (a,) High resolution TEM images with SAED pattern, (b) XRD pattern and (c) EDX analysis of Dumbbell shaped silver bismuth iodide heterostructure sample.                                                        | 4        |
| 3.   | <b>Table S1</b> Time dependent Photocurrent results Dumbbell shaped silver bismuth iodide heterostructure sample.                                                                                                                 | 5        |

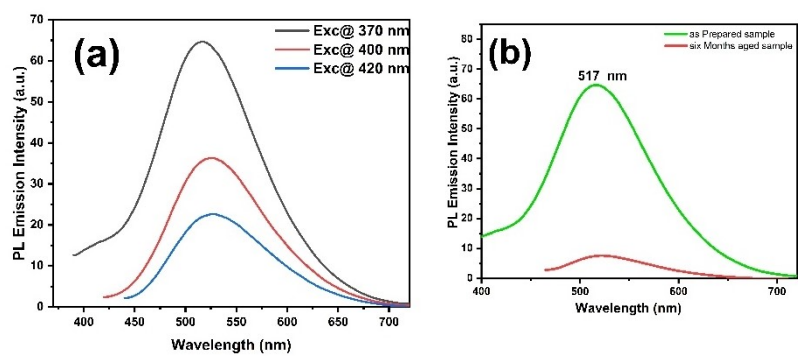

**Figure**  
**S1. (a)**

Excitation dependent Photoluminescence emission spectra and (b) PL emission spectra of as prepared and after six months aged Dumbbell shaped silver bismuth iodide perovskite hybrids samples, respectively.

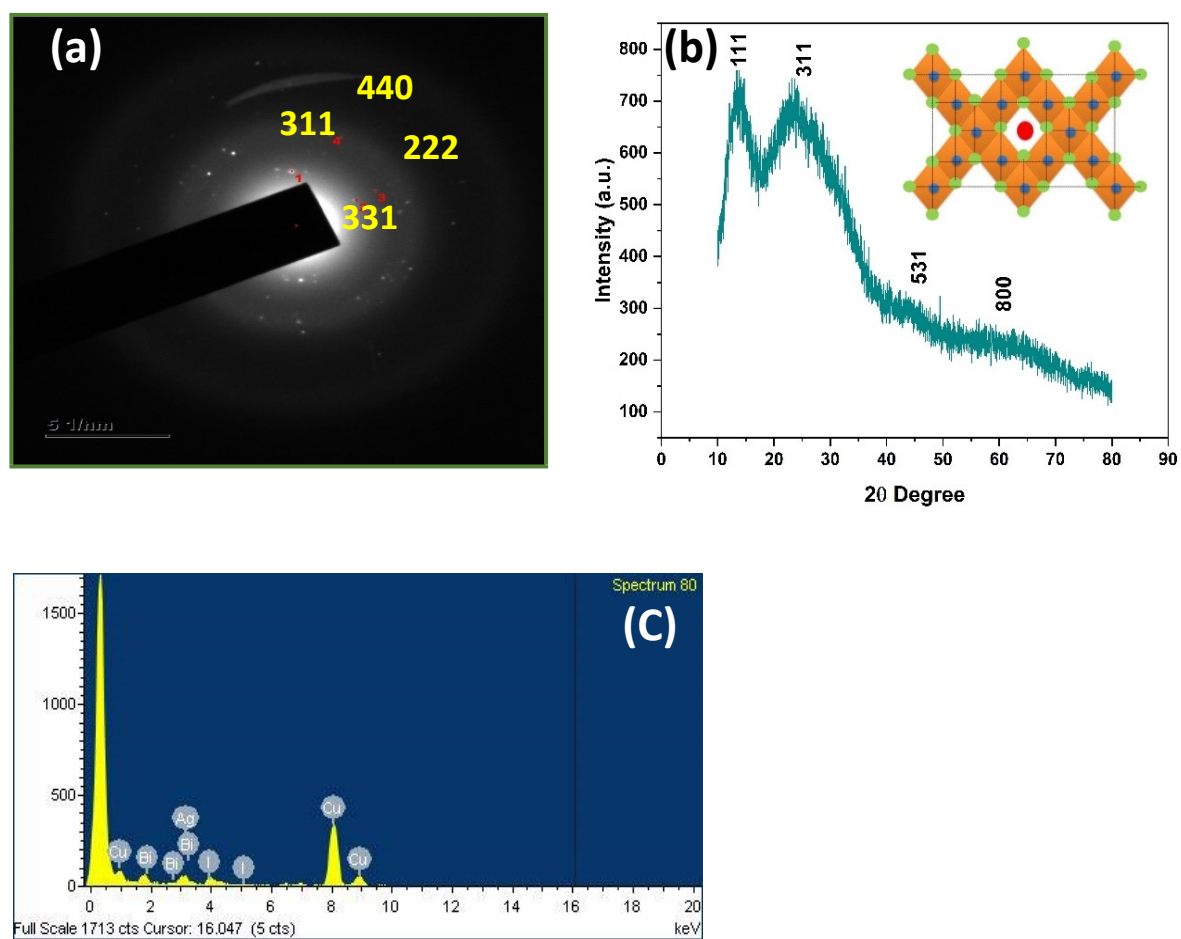

Figure S2. (a.) High resolution TEM images with SAED pattern, (b) XRD pattern and (c) EDX analysis of Dumbbell shaped silver bismuth iodide heterostructure sample.

| Sample                                 | Bias Volt | Current Light<br>( $I_{on}$ ) | Current dark<br>( $I_{off}$ ) | Photocurrent<br>on-off ratio<br>[ $I_{on}/I_{off}$ ] |
|----------------------------------------|-----------|-------------------------------|-------------------------------|------------------------------------------------------|
| <b>Dumbbell<br/>shaped<br/>AgBi2I7</b> | 0.1 V     | $2.1 \times 10^{-6}$ A        | $6.6 \times 10^{-10}$ A       | $3.18 \times 10^4$                                   |
|                                        | 0.2 V     | $67.3 \times 10^{-6}$ A       | $6.1 \times 10^{-8}$ A        | $3.27 \times 10^4$                                   |

Table S1 Time dependent Photocurrent results Dumbbell shaped silver bismuth iodide heterostructure sample.
